# Supplementary material for: Genetic variation and RNA structure regulate microRNA biogenesis
Source: PubMed Central journal article supplement (PMC5418625; doi:10.1038/ncomms15114), 2017-05-03
Supplement: ncomms15114-s1.pdf [file ncomms15114-s1.pdf]

**Supplementary Material**

**Supplementary Figures**

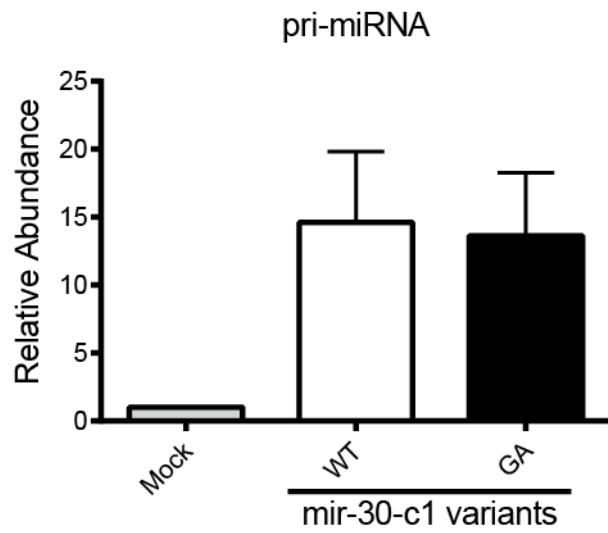

**Supplementary Figure 1** | Relative expression levels of primary miRNAs, pri-miR-30c-1 WT and the GA variant in MCF7 cells. Error bars indicate SEM (n=5)

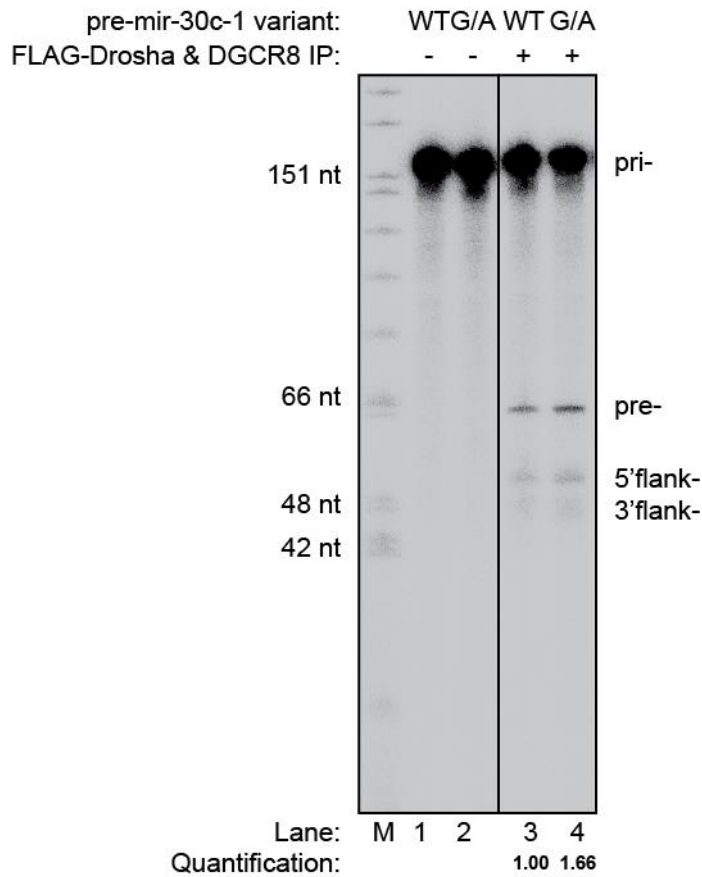

**Supplementary Figure 2** | Representative *in vitro* processing of shorter pri-mir-30c-1 substrates (153nt) comprising either a wild-type sequence (WT) or bearing the G/A mutation in the presence of immunopurified FLAG-Drosha/FLAG-DGCR8 complexes (+) or FLAG immunoprecipitates (-) from HEK293T cells. Quantification of pre-miRNA band intensities are shown below and expressed as the relative intensity normalized to pre-mir-30c-1 WT variant (lane 3). Intervening lanes were removed from the gel image, which is indicated by the black vertical line.

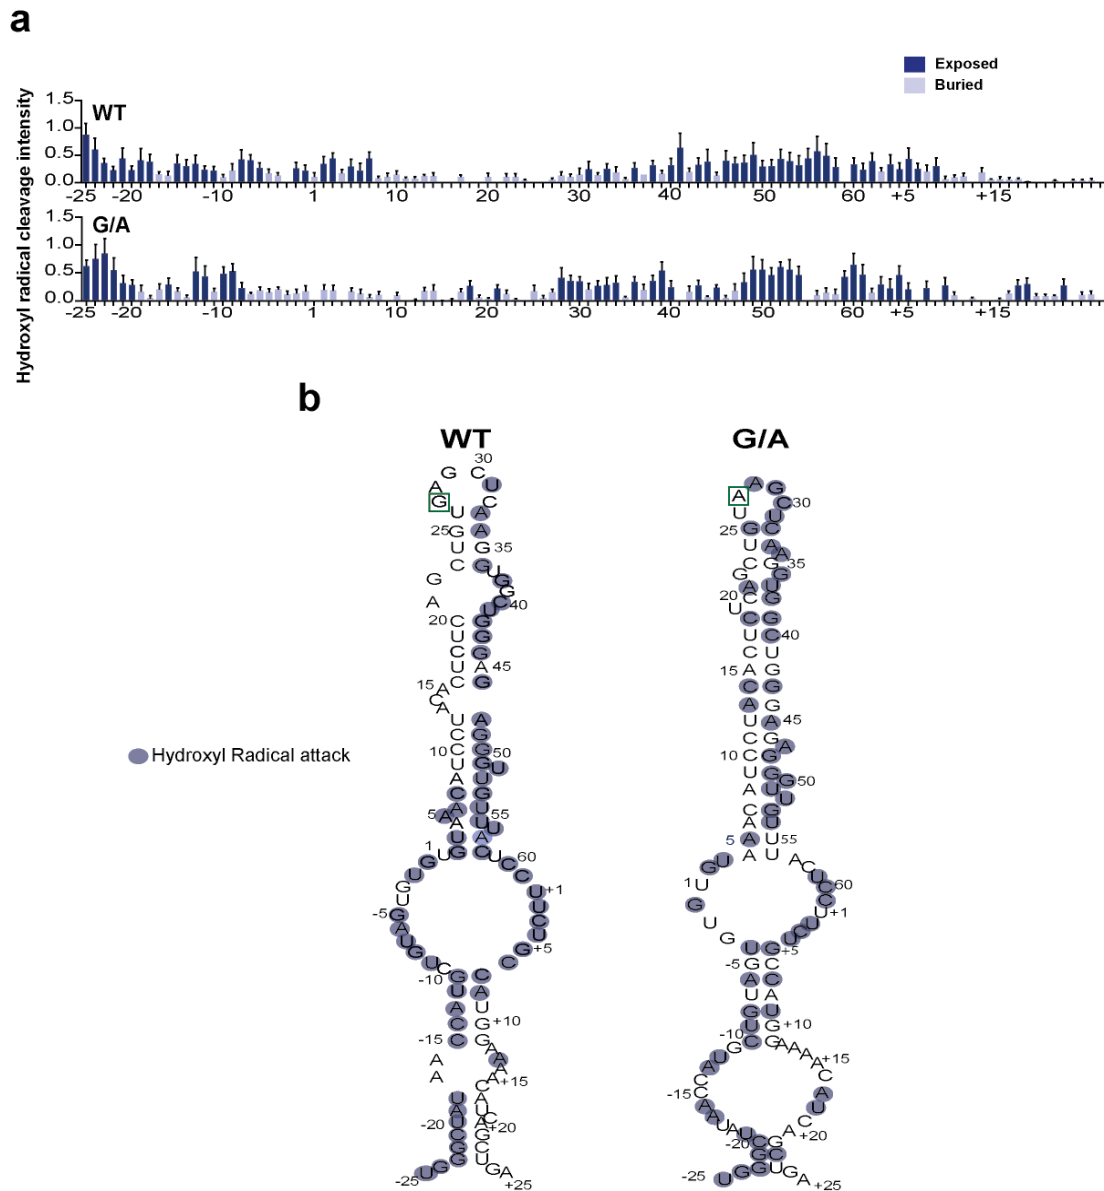

**Supplementary Figure 3|** (a) Histograms of cleavage intensity versus nucleotide position determined using *in situ*-generated hydroxyl radicals values corresponding to the mean cleavage ( $\pm$  SEM) ( $n=6$ ). (b) Predicted secondary structures of WT and G/A variant sequences, as determined by hydroxyl radical reactivity values.

**a**

|        | Accession number | Kda | Identified protein                             | Number peptides (WT/GA) |
|--------|------------------|-----|------------------------------------------------|-------------------------|
| COMMON | P11142           | 71  | Heat shock cognate 71 Kda protein              | 10/8                    |
|        | P09651           | 39  | Heterogeneous nuclear ribonucleoprotein A1     | 5/8                     |
|        | P09874           | 113 | Poly [ADP-ribose] polymerase 1                 | 5/3                     |
|        | Q00839           | 89  | Heterogeneous nuclear ribonucleoprotein U      | 5/4                     |
|        | Q92841           | 80  | ATP-dependent RNA helicase DDX17               | 5/4                     |
|        | P52597           | 46  | Heterogeneous nuclear ribonucleoprotein F      | 3/4                     |
|        | P22626           | 37  | Heterogeneous nuclear ribonucleoproteins A2/B1 | 3/6                     |
| WT     | P35637           | 53  | RNA binding protein FUS                        | 3                       |
|        | P38646           | 70  | stress 70 protein mitochondrial                | 3                       |
|        | P50991           | 57  | T complex protein 1                            | 3                       |
|        | Q16778           | 14  | Histone H2B type 2E                            | 3                       |
|        | Q96RS2           | 33  | 40S ribosomal protein                          | 3                       |
| G/A    | P84103           | 20  | Serine/arginine-rich splicing factor 3         | 3                       |

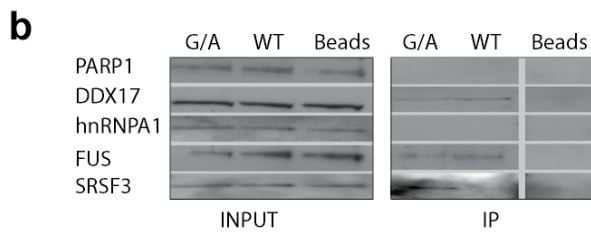

**Supplementary Figure 4** | Identification of proteins interacting with WT and G/A pri-miR30c-1 sequences. **(a)** Table shows proteins identified in two independent experiments. **(b)** Validation of the interaction of SRSF3 with the G/A variant sequence by RNA immunoprecipitation followed by Western Blot analysis with specific antibodies.

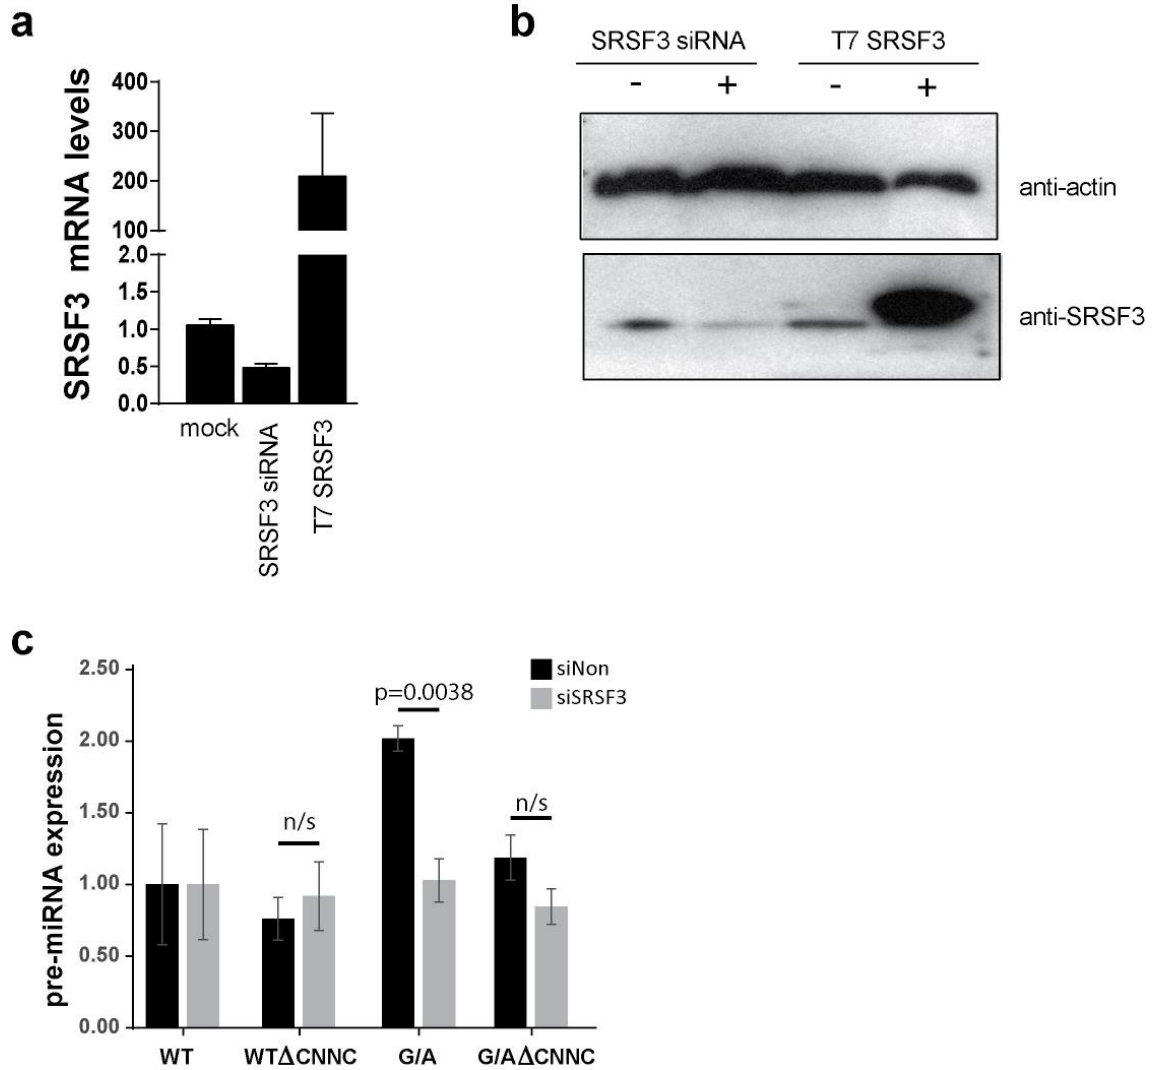

**Supplementary Figure 5 | SRSF3 levels following knock-down or overexpression in MCF7 cells. (a)** Analysis of SRSF3 mRNA levels. Error bars indicate SEM (n=5). **(b)** Representative Western blot of SRSF3 protein levels. **(c)** Relative expression levels of precursors, pre-miR-30c WT, WT  $\Delta$ CNNC, G/A and G/A  $\Delta$ CNNC in HeLa cells upon knock-down of SRSF3 (siSRSF3), as compared to a control siRNA (siNon). Pri- and Pre- levels were calculated using primers housed within the primary and precursor sequence of miR30c. The graph shows the relative levels of pre-miR30c normalized to either the siNon or siSRSF3 miR30c-1 WT. Significance between siNon/siSRSF3 miR30c levels was calculated using a t-test. Error bars indicate SEM (n=3)

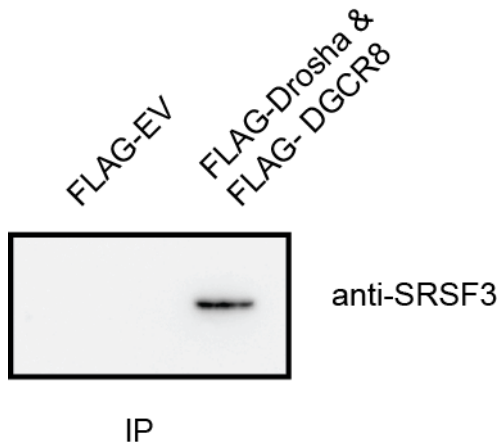

**Supplementary Figure 6** | Detection of SRSF3 protein in FLAG-Drosha/FLAG-DGCR8 complexes used in the *in vitro* processing assays shown on Fig 6 and Supplementary Fig. S2.

**a**

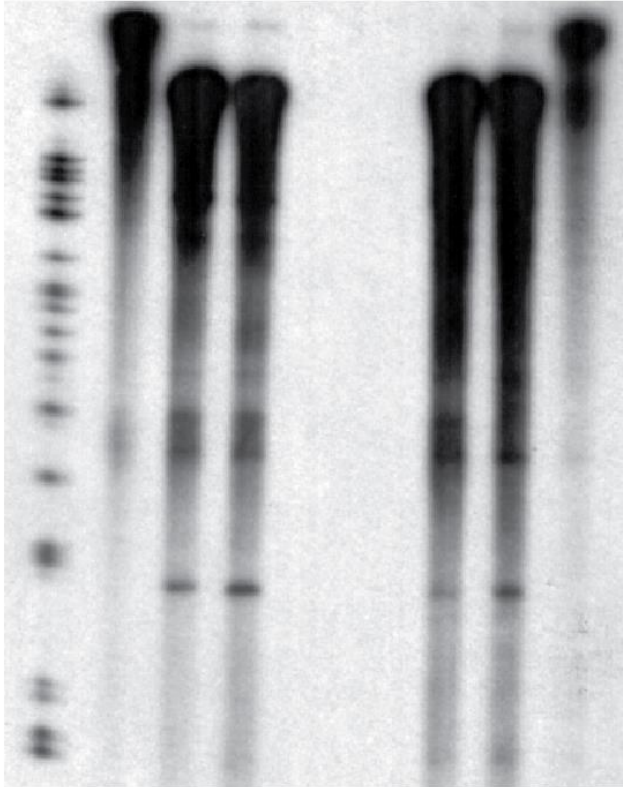

**b**

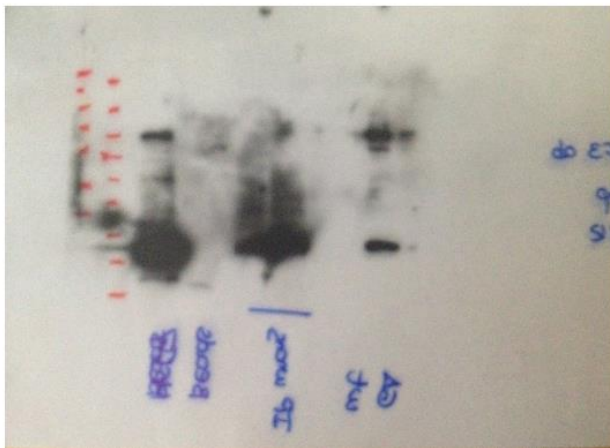

**Supplementary Figure 7 |** Uncropped scan Figures (a) Uncropped Exposure for Figure 1 d (b) Uncropped Western Blot for Figure 4 b.

| Name                    | Sequence 5'-3'                                                  | Orientation | modification |
|-------------------------|-----------------------------------------------------------------|-------------|--------------|
| <b>External</b>         |                                                                 |             |              |
| 30c-1s                  | CAAGTGGTTCTGTGTTTTTATTG                                         | Forward     |              |
| 30c-1a                  | GTA CT TAGCCACAGAAGCGCA                                         | Reverse     |              |
| CNNCs                   | CTGCTTACTGGCTTATCG                                              | Forward     |              |
| CNNCa                   | GATATCTGCAGAATTC ACTAG                                          | Reverse     |              |
| <b>mutagenics</b>       |                                                                 |             |              |
| 30Cmut1                 | CCTTGAGCTTACAGCTGAGAG                                           | Reverse     |              |
| 30Cmut2                 | CTCTCAGCTGTAAGCTCAAGG                                           | Forward     |              |
| CNNCmut1                | CTTCATTTGATGTTTTCCATGGC                                         | Reverse     |              |
| CNNCmut2                | CTTCTTTTTTTTTTTCCATGGC                                          | Reverse     |              |
| DCNNC                   | CTTCAGATGTTTTCCATGGC                                            | Reverse     |              |
| <b>RT-qPCR</b>          |                                                                 |             |              |
| TL                      | CTGCTTACTGGCTTATCG                                              | Forward     |              |
| TL                      | CCACTTGAATCGAATTCCAG                                            | Reverse     |              |
| b-actin                 | GGGTCAGAAGGATTCCTATG                                            | Forward     |              |
| b-actin                 | GGTCTCAAACATGATCTGGG                                            | Reverse     |              |
| <b>Primer extension</b> |                                                                 |             |              |
| premir30c1 RT           | CTAGATGCATGCTCGAGCG                                             | Reverse     | NED          |
| premir30c1 RT           | CTAGATGCATGCTCGAGCG                                             | Reverse     | VIC          |
| <b>RNA oligos</b>       |                                                                 |             |              |
| Pre-miR-30c wt          | UGUAAACAUCCUACACUCUCAGCUGUGAGCUCAAGGUGGCUGGGAGAGGGUUGUUUACUCC   |             |              |
| Pre-miR-30c G/A         | UGUAAACAUCCUACACUCUCAGCUGUAAGCUCAAGGUGGCUGGGAGAGGGUUGUUUACUCC   |             |              |
| Pre-miR-30a             | UGUAAACAUCCUCGACUGGAAGCUGUGAAGCCACAAAUGGGCUUUCAGUCGGAUGUUUGCAGC |             |              |

Supplementary table 1 | Oligonucleotide sequences
